# Supplementary material for: The obesity-induced adipokine sST2 exacerbates adipose Treg and ILC2 depletion and promotes insulin resistance
Source: PubMed Central journal article supplement — Sci Adv. 2020 May 13;6(20):eaay6191. doi: 10.1126/sciadv.aay6191 (PMC7220368; doi:10.1126/sciadv.aay6191), 2020-05-13
Supplement: aay6191_SM.pdf [file aay6191_SM.pdf]

## Supplementary Materials for

### **The obesity-induced adipokine sST2 exacerbates adipose T<sub>reg</sub> and ILC2 depletion and promotes insulin resistance**

Xu-Yun Zhao\*, Linkang Zhou, Zhimin Chen, Yewei Ji, Xiaoling Peng, Ling Qi, Siming Li, Jiandie D. Lin\*

\*Corresponding author. Email: jdlin@umich.edu (J.D.L.); xuyunzhao@shsmu.edu.cn (X.-Y.Z.)

Published 13 May 2020, *Sci. Adv.* **6**, eaay6191 (2020)  
DOI: 10.1126/sciadv.aay6191

#### **This PDF file includes:**

Figs. S1 to S5  
Table S1

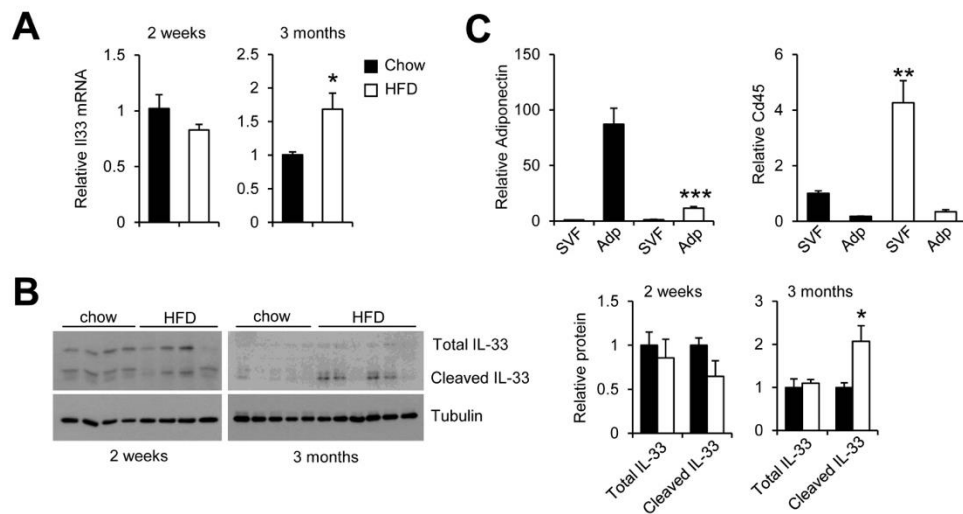

**Fig. S1. Regulation of IL-33 expression in mouse eWAT.** (A) qPCR analysis of IL33 expression in eWAT from mice fed chow (filled, n=4) or HFD (open, n=4) for 2 weeks (left), and chow (filled, n=5) or HFD (open, n=6) for 3 months (right). (B) Immunoblots of total eWAT lysates from HFD-fed mice. Quantitation of IL-33 protein levels is shown on the right. Data in A-B represent mean  $\pm$  SEM. \* $p < 0.05$ , Chow vs. HFD, two-tailed unpaired Student's t-test. (C) qPCR analysis of gene expression in stromal vascular fraction (SVF) and adipocytes (Adp) isolated from eWAT from mice fed chow (filled, n=3) or HFD (open, n=3). Data represent mean  $\pm$  SEM. \*\* $p < 0.01$ , \*\*\* $p < 0.001$ , SVF vs. Adp, two-way ANOVA.

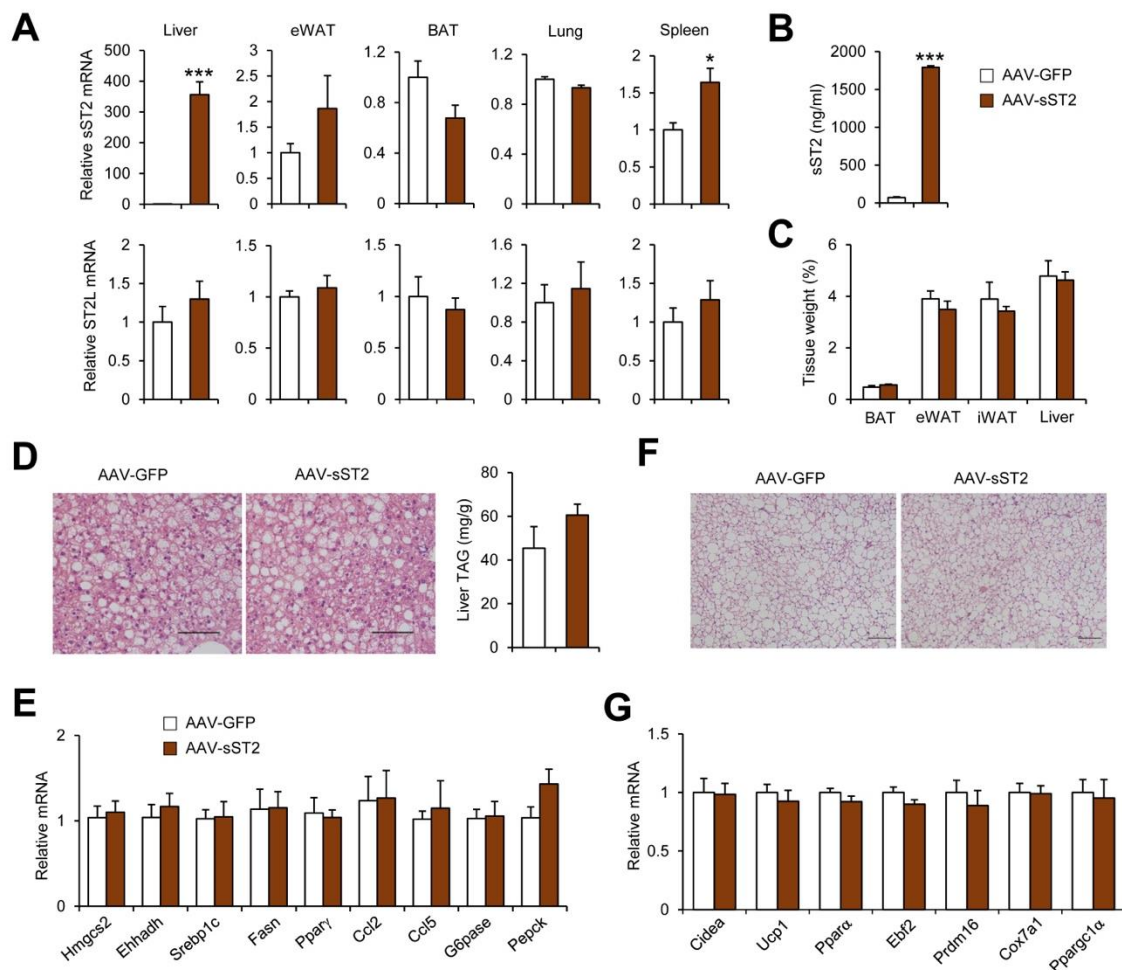

**Fig. S2. Effects of sST2 overexpression on metabolic parameters following HFD feeding.** (A) qPCR analysis of sST2 and ST2L expression in tissues from mice transduced with AAV-GFP (open, n=5) or AAV-sST2 (filled, n=6) and fed HFD for 10 weeks. (B) Plasma sST2 concentration in transduced mice. (C) Tissue to body weight ratio. (D) H&E staining of liver sections (left) and liver triglyceride (TAG) content (right) in transduced mice. (E) qPCR analysis of hepatic gene expression. (F) H&E staining of BAT sections. (G) qPCR analysis of BAT gene expression. Data in A-D and E, G represent mean  $\pm$  SEM. \* $p < 0.05$ , \*\*\* $p < 0.001$ , GFP vs. sST2, two-tailed unpaired Student's t-test.

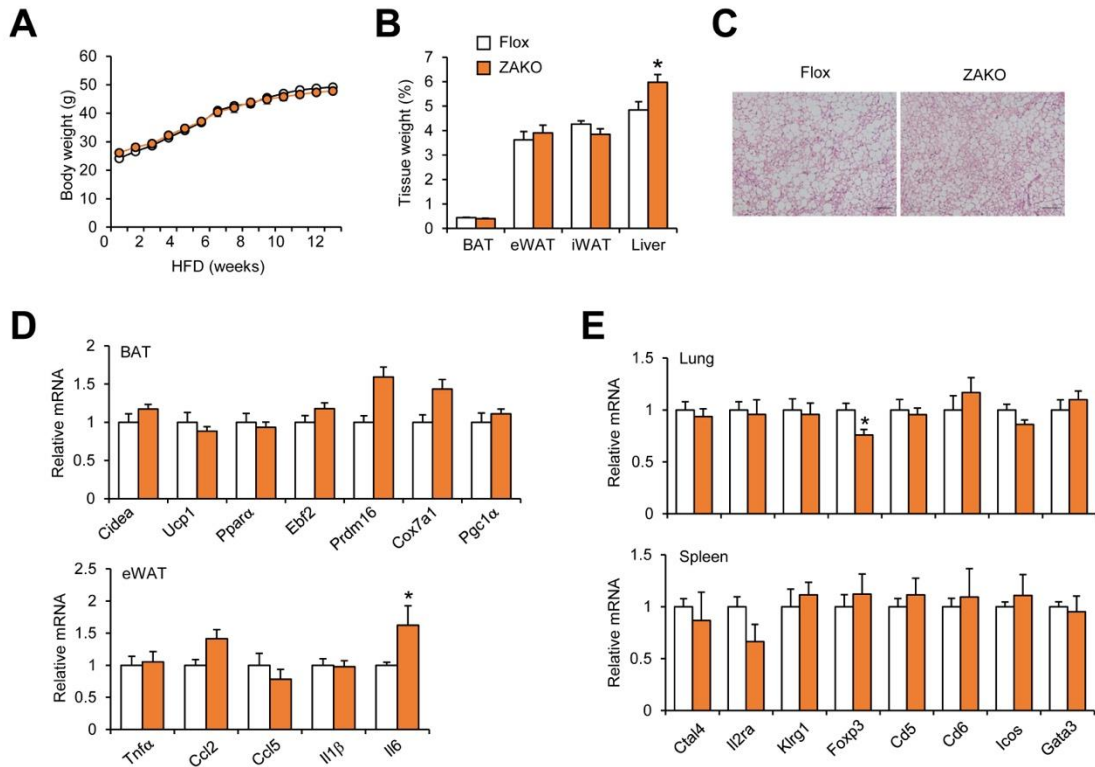

**Fig. S3. Effects of *Zbtb7b* inactivation on metabolic parameters following HFD feeding.** (A). Body weight of Flox (open, n=7) and ZAKO (filled, n=5) mice fed HFD for 13 weeks. Data represent mean  $\pm$  SEM; two-way ANOVA with multiple comparisons. (B). Tissue to body weight ratio in HFD-fed mice. (C). H&E staining of BAT section. (D) qPCR analysis of BAT (top) and eWAT (bottom) gene expression. (E) qPCR analysis of lung (top) and spleen (bottom) gene expression. Data in B and D-E represent mean  $\pm$  SEM. \* $p < 0.05$ , Flox vs. ZAKO, two-tailed unpaired Student's t-test.

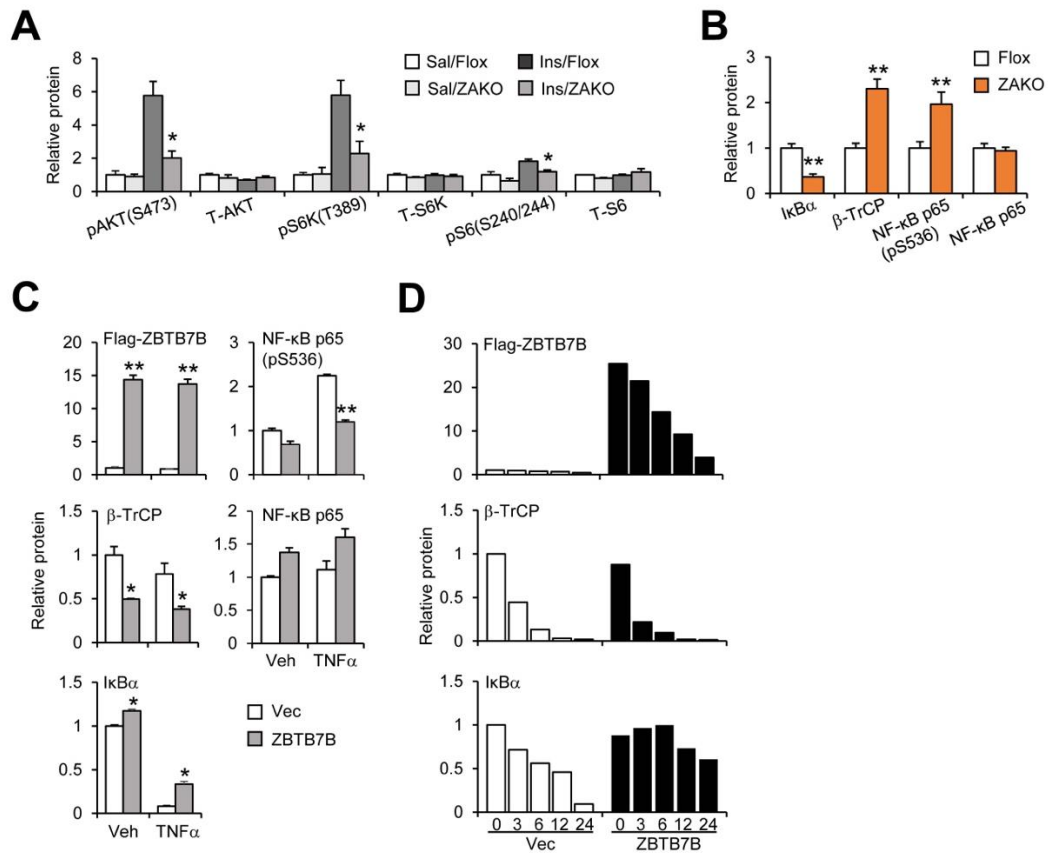

**Fig. S4. Quantitation of immunoblots.** (A) Quantitation of immunoblots in Fig. 4C. (B) Quantitation of immunoblots in Fig. 6A. (C) Quantitation of immunoblots Fig. 6B. (D) Quantitation of immunoblots Fig. 6D. Data in A-C represent mean  $\pm$  SEM. \* $p < 0.05$ , \*\* $p < 0.01$ , Flox vs. ZAKO (A-B), Vec vs. ZBTB7B (C), two-tailed unpaired Student's t-test.

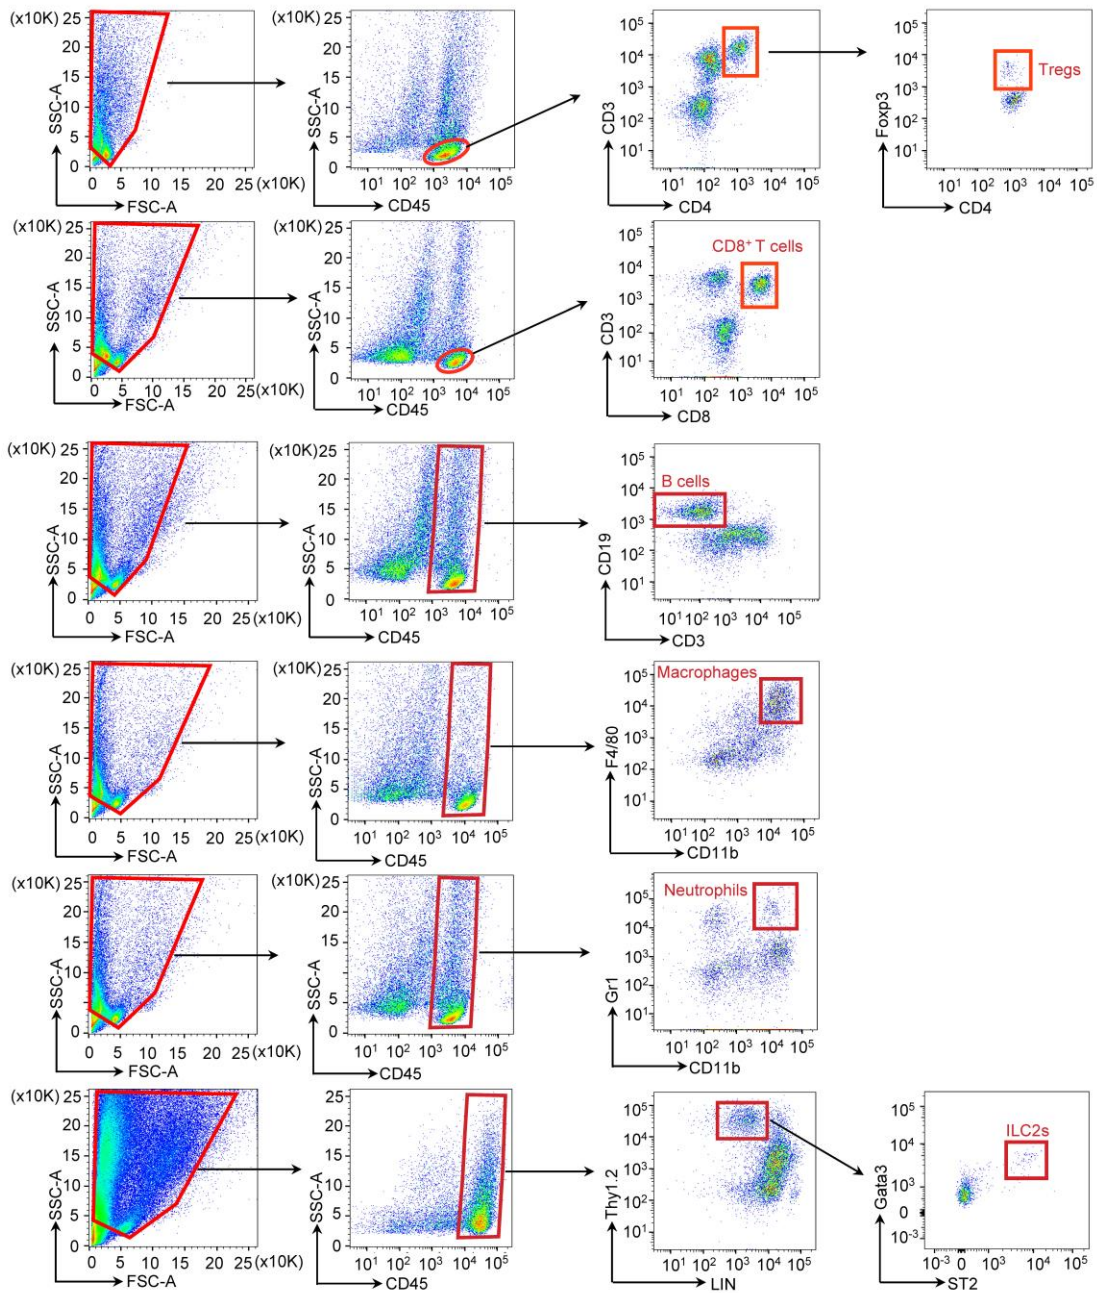

**Fig. S5. Flow cytometry gating strategies.** Gating strategies for flow cytometry analysis of adipose tissue Tregs, CD8<sup>+</sup> T cells, B cells, Macrophages, Neutrophils, and ILC2s.

**Table S1: List of qPCR primer sequences.**

| <b>Gene</b> | <b>5' Primer</b>         | <b>3' Primer</b>         |
|-------------|--------------------------|--------------------------|
| sST2        | AAGGTCGAAATGAAAGTTCCAGC  | GCCAATTTATTCAAGCAATGTGTG |
| ST2L        | TGCATTTATGGGAGAGACCTGTTA | TGTGCAGAGCAATCTCCTGC     |
| Il33        | GGTCCCGCCTTGCAAATA       | CTCTTCATGCTTGGTACCCGAT   |
| Il6         | GGGAAATCGTGGAAATGAG      | TGAAGGACTCTGGCTTTGTC     |
| Ccl2        | AGGTCCCTGTCATGCTTCTG     | TCTGGACCCATTCCTTCTTG     |
| Ccl5        | TGCCACGTCAAGGAGTATTT     | TTCTCTGGGTTGGCACACACT    |
| Clec4d      | ACCATCAACACCGAAGCAGAAC   | TCCCCCTTTTCCCAGAATACC    |
| Ctla4       | TCACCATCCAAGGACTGAGAGC   | CGACAAGGATCCAAAGGAGGA    |
| Il2ra       | AACCACCACAGACTTCCCACAA   | TTCTCCATCTGTGTTGCCAG     |
| Klrg1       | TGTATCAACGGATCCTGTGCTG   | GGAGATGTGAGCCTTTGTCTGC   |
| Foxp3       | CCTTCCCAGAGTTCTTCCACAA   | GCGAACATGCGAGTAAACCAAT   |
| Cd5         | ATGCCAAGACCCAAACCCA      | CCACTGACGCTGCTTTTTTCTG   |
| Cd6         | TTCCTGGCGGTTCAACAAC      | TCCTTATCCTTCACGCTCACC    |
| Icos        | AAACAACCCAGACAGCTCCCA    | ACAACGAAAGCTGCACACCCT    |
| Gata3       | ACCACCCCATTACCACCTATCC   | AGTTCACACACTCCCTGCCTTC   |
| Il5         | ACGATGAGGCTTCCTGTCCCTA   | CACTTCTCTTTTTGGCGGTCAA   |
| Mmp2        | CAACGGTTCGGGAATACAGCAGC  | TGGAAGCGGAACGGGAAGTTG    |
| Mmp12       | TGGAGCTCACGGAGACTTCAA    | CAACAAGGAAGAGGTTTGTGCC   |
| Colla1      | AAGAGGCGAGAGAGGTTTCC     | AGAACCATCAGCACCTTTGG     |
| Colla2      | AGGTCCCTAATGGAGATGCCG    | CACAGGGCCTTCTTTACCAG     |
| Acta2       | CTGACAGAGGCACCACTGAA     | CATCTCCAGAGTCCAGCACA     |
| Lox12       | TGCAACAAACACTGGACAGCC    | TGGAGATATGCGCTTCAGTGC    |
| Mmp13       | TGCTTCTGATGATGACGTTCAAGG | TGGGATGCTTAGGGTTGGGGTC   |
| Tgfb1       | ACCATGCCAACTTCTGTCTGGGAC | ACAACCTGCTCCACCTTGGGCTTG |
| Zbtb7b      | CTCACCCATCCCTTGACCTA     | CCAGCTCCTCTGGTGATAGC     |
| Hmgcs2      | GACATCAACTCCCTGTGCCTG    | GATGTCAGTGTTGCCTGAATC    |
| Ehhadh      | CAGATGAAGCACTCAAGCTTG    | ACCTTGGCAATGGCTTCTGCA    |

|                |                         |                         |
|----------------|-------------------------|-------------------------|
| Srebp1c        | ATCGGCGCGGAAGCTGTCCG    | GGGAAGTCACTGTCTTGGTTG   |
| Fasn           | GGTTACACTGTGCTAGGTGTTG  | TCCAGGCGCATGAGGCTCAGC   |
| Ppar $\gamma$  | CCGTAGAAGCCGTGCAAGAG    | GGAGGCCAGCATCGTGTAGA    |
| G6pase         | ACACCGACTACTACAGCAACAG  | CCTCGAAAGATAGCAAGAGTAG  |
| Pepck          | CATATGCTGATCCTGGGCATAAC | CAAACCTTCATCCAGGCAATGTC |
| Cidea          | GCAGCCTGCAGGAACTTATCAGC | GATCATGAAATGCGTGTTGTCC  |
| Ucp1           | GGCATTTCAGAGGCAAATCAGCT | CAATGAACACTGCCACACCTC   |
| Ppar $\alpha$  | GCAGTGCCCTGAACATCGA     | CGCCGAAAGAAGCCCTTAC     |
| Ebf2           | GGAACCGGAACGAGACCCCT    | TCCCTTGGGTTTCCCGCTGT    |
| Prdm16         | CGGAAGAGCGTGAGTACAAATG  | TCCGTGAACACCTTGACACAGT  |
| Cox7a1         | GTCTCCCAGGCTCTGGTCCG    | CTGTACAGGACGTTGTCCATTC  |
| Pgc-1 $\alpha$ | AGCCGTGACCACTGACAACGAG  | GCTGCATGGTTCTGAGTGCTAAG |
| TNF $\alpha$   | AGCCCCAGTCTGTATCCTT     | CTCCCTTTGCAGAACTCAGG    |
| Il1 $\beta$    | TGGCAACTGTTCCCTGAACTCAA | AGCAGCCCTTCATCTTTTGG    |
